# Supplementary material
Source: publisher site journal article supplement (http://www.degruyter.com/publication/journal_key/ECFR/downloadAsset/ECFR_ZGR%20ECFR%20Guidelines%20for%20Ensuring%20Good%20Research%20Practices.pdf)
Supplement: Supplementary file 1 [file ECFR_ZGR%20ECFR%20Guidelines%20for%20Ensuring%20Good%20Research%20Practices.pdf]

# **Zeitschrift für Unternehmens- und Gesellschaftsrecht (ZGR)**

## **European Company and Financial Law Review (ECFR)**

### **– Guidelines for Ensuring Good Scientific Practice –**

1. Any paper submitted for publication to the ZGR or the ECFR has to be written in full compliance with the rules of good scientific practice.
2. The invitation to write and publish a paper (*i.e.*, a solicited paper) for the ZGR or the ECFR is strictly personal. Without express written permission of the ZGR or the ECFR, as it were, the invitation may not be transferred to another author or to multiple other authors nor may another author or multiple other authors be involved.
3. Solicited and unsolicited papers, likewise, will be, in principle, accepted under the condition that they have not
  - either previously or simultaneously, either domestically or abroad, either in printed or digital form been published or, as it may be, will not be published by another entity, or
  - will not be, at the same time either domestically or abroad be offered for publication in printed or digital form to another entity.

Exceptions require prior express written permission. A subsequent secondary publication in another language may be permitted if, therein, an explicit reference is included indicating the primary publication in the ZGR or, as it may be, the ECFR.

4. Solicited and unsolicited papers must include, by individual name, all persons who participated as authors in the writing of the paper in the header of the paper. With respect to multiple authors, ZGR and ECFR respectively retain the right to modify the suggested order of the naming for the purposes of printing.

Authors are those individuals - but only those individuals - who themselves substantively contributed to the concept, development and/or formulation of the paper and who bear responsibility for its contents. "Honorary authorship", *i.e.*, a specification by name as an author or co-author without a substantive own contribution, is impermissible.

Individuals who contributed to the preparation, development and/or correction of the paper without being authors are to be specified by name as such in the first footnote ("asterisk footnote") or the paper.

5. A submitted paper which entirely or in part originates from a solicitation (in particular, a request to render an expert opinion) has to indicate such origin by appropriate notice in the first footnote of the paper.
